# Supplementary material for: The Simplified Comorbidity Index: a new tool for prediction of nonrelapse mortality in allo-HCT
Source: PubMed Central journal article supplement — Blood Adv. 2022 Mar 3;6(5):1525–35. doi: 10.1182/bloodadvances.2021004319 (PMC8905694; doi:10.1182/bloodadvances.2021004319), 2022-03-03
Supplement: advancesADV2021004319-suppl1.pdf [file advancesADV2021004319-suppl1.pdf]

**Table S1 –Definitions of Comorbidities**

| <b>Comorbidity</b>             | <b>HCT-CI Definition</b>                                                                                                              | <b>SCI Definition</b>                                                                                                                                                                                                                                                                                                                                                                                                                                      |
|--------------------------------|---------------------------------------------------------------------------------------------------------------------------------------|------------------------------------------------------------------------------------------------------------------------------------------------------------------------------------------------------------------------------------------------------------------------------------------------------------------------------------------------------------------------------------------------------------------------------------------------------------|
| <b>Arrhythmia</b>              | Atrial fibrillation or flutter, sick sinus syndrome, or ventricular arrhythmias                                                       | <b>Composite cardiac disease/dysfunction</b><br>- Any condition included falling under the definition arrhythmia, cardiac, or heart valve disease in the HCT-CI                                                                                                                                                                                                                                                                                            |
| <b>Cardiac</b>                 | Coronary artery disease, congestive heart failure, history of myocardial infarction, or left ventricular ejection fraction $\leq$ 50% |                                                                                                                                                                                                                                                                                                                                                                                                                                                            |
| <b>Heart valve disease</b>     | Except mitral valve prolapse                                                                                                          |                                                                                                                                                                                                                                                                                                                                                                                                                                                            |
| <b>Diabetes Mellitus</b>       | Diabetes Mellitus requiring treatment with insulin or hypoglycemic agents at the time of initiation of conditioning                   | Not included                                                                                                                                                                                                                                                                                                                                                                                                                                               |
| <b>Mild Hepatic</b>            | Serum bilirubin between ULN and 1.5 times ULN; ALT or AST between ULN and 2.5 times ULN, or chronic hepatitis                         | <b>Moderate to severe hepatic dysfunction</b> – only moderate to severe hepatic comorbidity qualify as a hepatic comorbidity by the SCI                                                                                                                                                                                                                                                                                                                    |
| <b>Moderate/Severe Hepatic</b> | Serum bilirubin greater than 1.5 times ULN; ALT or AST greater than 2.5 times ULN, or chronic hepatitis                               |                                                                                                                                                                                                                                                                                                                                                                                                                                                            |
| <b>Infection</b>               | Infection requiring antimicrobial therapy continuing after the date of transplantation (day 0)                                        | Not included                                                                                                                                                                                                                                                                                                                                                                                                                                               |
| <b>Obesity</b>                 | Body mass index $\geq$ 35 kg/m <sup>2</sup>                                                                                           | Not included                                                                                                                                                                                                                                                                                                                                                                                                                                               |
| <b>Psychiatric</b>             | Depression or anxiety which requires treatment at the time of transplantation                                                         | Not included                                                                                                                                                                                                                                                                                                                                                                                                                                               |
| <b>Moderate Pulmonary</b>      | DLC <sub>o</sub> <sup>a</sup> or FEV <sub>1</sub> 66-80% or dyspnea on slight activity                                                | <b>Identical criteria</b>                                                                                                                                                                                                                                                                                                                                                                                                                                  |
| <b>Severe Pulmonary</b>        | DLC <sub>o</sub> <sup>a</sup> or FEV <sub>1</sub> < 66 or dyspnea at rest/oxygen dependent                                            | <b>Identical criteria</b>                                                                                                                                                                                                                                                                                                                                                                                                                                  |
| <b>Moderate/severe renal</b>   | Serum creatinine > 2 mg/dL, on dialysis, or prior renal transplantation                                                               | <b>Renal dysfunction</b> was defined according to estimated glomerular filtration rate (eGFR) mL/min/ 1.73 m <sup>2</sup> , using the Chronic Kidney Disease Epidemiology Collaboration (CKD-EPI) formula for estimating creatinine clearance. A eGFR $\geq$ 90 ml/min/1.73 m <sup>2</sup> was considered normal, between 60 to 89.9 ml/min/1.73 m <sup>2</sup> mildly decreased, and below 60 ml/min/1.73 m <sup>2</sup> moderately to severely decreased |
| <b>Cerebrovascular disease</b> | Transient ischemic attack or cerebrovascular accident                                                                                 | Not included                                                                                                                                                                                                                                                                                                                                                                                                                                               |
| <b>Rheumatologic</b>           | SLE, RA, polymyositis, mixed CTD, or polymyalgia rheumatica                                                                           | Not included                                                                                                                                                                                                                                                                                                                                                                                                                                               |

|                                   |                                                                                                                                                             |              |
|-----------------------------------|-------------------------------------------------------------------------------------------------------------------------------------------------------------|--------------|
| <b>Prior malignancy</b>           | Malignancy unrelated to the indication for transplantation which has been treated at any point in the patient's history, excluding non-melanoma skin cancer | Not included |
| <b>Peptic ulcer</b>               | Requiring treatment                                                                                                                                         | Not included |
| <b>Inflammatory bowel disease</b> | Crohn disease or ulcerative colitis                                                                                                                         | Not included |

ULN – upper limit of normal; ALT – alanine aminotransferase; AST – aspartate aminotransferase; DLCo – diffusion capacity of the lung for carbon monoxide; FEV<sub>1</sub> – forced expiratory volume in one second; DLco, diffusion capacity of carbon monoxide; SLE – systemic lupus erythmatosis; RA – rheumatoid arthritis; CTD – connective tissue disease

<sup>a</sup> DLCo corrected for hemoglobin using the Cotes formula as per institutional standard

**Table S2 –Comparison of population characteristics by HCT-CI**

|                                            |                                     | HCT-CI 0-3        | HCT-CI ≥ 4        |        |
|--------------------------------------------|-------------------------------------|-------------------|-------------------|--------|
| <b>Recipient age, years (median [IQR])</b> |                                     | 54 [43, 62]       | 58 [51, 65]       | <0.001 |
|                                            | Age < 60                            | 234 (67)          | 124 (55)          | 0.005  |
|                                            | Age ≥ 60                            | 114 (33)          | 101 (45)          |        |
| <b>Recipient sex (%)</b>                   | <i>Male</i>                         | 201 (58)          | 128 (57)          | 0.905  |
|                                            | <i>Female</i>                       | 147 (42)          | 97 (43)           |        |
| <b>Karnofsky Performance Status (%)</b>    | <i>90-100</i>                       | 243 (70)          | 122 (54)          | <0.001 |
|                                            | <i>&lt;90</i>                       | 104 (30)          | 103 (46)          |        |
| <b>Recipient CMV serostatus (%)</b>        | <i>absent</i>                       | 133 (38)          | 89 (40)           | 0.816  |
|                                            | <i>present</i>                      | 215 (62)          | 136 (60)          |        |
| <b>Diagnosis (%)</b>                       | <i>Acute myeloid leukemia</i>       | 135 (39)          | 82 (36)           | 0.395  |
|                                            | <i>Myelodysplastic syndrome</i>     | 66 (19)           | 59 (26)           |        |
|                                            | <i>Multiple myeloma</i>             | 72 (21)           | 43 (19)           |        |
|                                            | <i>Acute lymphoblastic leukemia</i> | 35 (10)           | 22 (10)           |        |
|                                            | <i>Myeloproliferative neoplasm</i>  | 21 (6)            | 10 (4)            |        |
|                                            | <i>Chronic myeloid leukemia</i>     | 13 (4)            | 4 (2)             |        |
|                                            | <i>Other leukemia</i>               | 6 (2)             | 5 (2)             |        |
| <b>CIBMTR disease risk (%)</b>             | <i>low/intermediate</i>             | 231 (66)          | 156 (69)          | 0.589  |
|                                            | <i>high</i>                         | 86 (25)           | 54 (24)           |        |
|                                            | <i>unclassifiable</i>               | 31 (9)            | 15 (7)            |        |
| <b>Month from Dx to HCT (median [IQR])</b> |                                     | 7 [4, 24]         | 8 [5, 26]         | 0.357  |
| <b>Donor/recipient sex (%)</b>             | Female/male                         |                   |                   |        |
|                                            | <i>other</i>                        |                   |                   |        |
| <b>Donor type* (%)</b>                     | <i>Matched related</i>              | 119 (34)          | 73 (32)           | 0.455  |
|                                            | <i>Matched unrelated</i>            | 175 (50)          | 108 (48)          |        |
|                                            | <i>HLA Mismatched</i>               | 54 (16)           | 44 (20)           |        |
| <b>HCT year (median [IQR])</b>             |                                     | 2014 [2012, 2016] | 2013 [2012, 2016] | 0.141  |
| <b>Regimen (%)</b>                         | <i>Melphalan-based</i>              | 246 (71)          | 190 (84)          | <0.001 |
|                                            | <i>TBI-based</i>                    | 102 (29)          | 35 (16)           |        |

IQR – interquartile range; HCT-CI – hematopoietic cell transfer comorbidity index; CMV – cytomegalovirus; CIBTMR – center for international bone and marrow transplantation; Dx- diagnosis; HCT – hematopoietic cell transplantation; TBI – total body irradiation

**Table S3 –Cox Multivariable Regression for non-relapse mortality and overall survival in the Memorial Sloan Kettering cohort**

|                                     | Non-relapse mortality |                  | Overall survival |         |
|-------------------------------------|-----------------------|------------------|------------------|---------|
|                                     | HR (95% CI)           | P-value          | HR (95% CI)      | P-value |
| <b>SCI score</b>                    |                       |                  |                  |         |
| 0                                   |                       | <i>Reference</i> |                  |         |
| 1                                   | 3.39 (0.92-12.41)     | 0.066            | 1.64 (0.74-3.65) | 0.223   |
| 2                                   | 6.7 (1.83-24.58)      | 0.004            | 3.28 (1.49-7.23) | 0.003   |
| 3                                   | 7.64 (1.92-30.39)     | 0.004            | 3.1 (1.23-7.82)  | 0.016   |
| ≥ 4                                 | 7.95 (1.44-43.71)     | 0.017            | 3.41 (0.85-13.6) | 0.083   |
| <b>Regimen</b>                      |                       |                  |                  |         |
| <i>Melphalan-based</i>              |                       | <i>Reference</i> |                  |         |
| <i>TBI-based</i>                    | 0.61 (0.22-1.71)      | 0.349            | 0.92 (0.45-1.86) | 0.812   |
| <b>Karnofsky performance status</b> |                       |                  |                  |         |
| ≤ 80                                |                       | <i>Reference</i> |                  |         |
| 90 -100                             | 0.71 (0.34-1.49)      | 0.368            | 0.57 (0.33-1)    | 0.048   |
| <b>CIBMTR Disease Risk</b>          |                       |                  |                  |         |
| <i>Low/Intermediate</i>             |                       | <i>Reference</i> |                  |         |
| <i>High</i>                         | 0.87 (0.37-2.08)      | 0.758            | 1.18 (0.61-2.27) | 0.622   |
| <i>Unclassifiable</i>               | 0.77 (0.26-2.24)      | 0.629            | 0.79 (0.3-2.05)  | 0.623   |
| <b>Recipient CMV serostatus</b>     |                       |                  |                  |         |
| <i>Negative</i>                     |                       | <i>Reference</i> |                  |         |
| <i>Positive</i>                     | 0.84 (0.4-1.74)       | 0.634            | 1.13 (0.64-2)    | 0.665   |
| <b>Donor type</b>                   |                       |                  |                  |         |
| <i>Matched related</i>              |                       | <i>Reference</i> |                  |         |
| <i>Matched unrelated</i>            | 1.27 (0.59-2.74)      | 0.549            | 1.12 (0.63-1.99) | 0.702   |
| <i>Mismatched</i>                   | 2.39 (0.82-6.97)      | 0.109            | 1.81 (0.76-4.34) | 0.181   |
| <b>Acute GvHD grade*</b>            |                       |                  |                  |         |
| 0 - 1                               |                       | <i>Reference</i> |                  |         |
| ≥ 2                                 | 2.28 (1.12-4.66)      | 0.024            | 2.07 (1.16-3.68) | 0.014   |

\* Time-dependent covariate

CI – confidence interval; HR – hazard ratio; SCI – simplified comorbidity index; EBMT – European Society for Blood and Marrow Transplantation; CMV - cytomegalovirus CMV – cytomegalovirus; GvHD – graft-versus host disease

**Table S4- Non-relapse mortality discrimination of the Simplified Comorbidity Index (SCI) with and without age**

| Years post HCT | MSKCC cohort                        |                                        | Sheba cohort                        |                                        |
|----------------|-------------------------------------|----------------------------------------|-------------------------------------|----------------------------------------|
|                | <b>SCI original</b><br>AUC (95% CI) | <b>SCI without age</b><br>AUC (95% CI) | <b>SCI original</b><br>AUC (95% CI) | <b>SCI without age</b><br>AUC (95% CI) |
| 1              | 70.3 (64.4 - 76.1)                  | 68.1 (62.1 - 74.1)                     | 72.0 (62.0-76.5)                    | 70.1 (62.1, 78.1)                      |
| 2              | 68.9 (63.3 - 74.4)                  | 66.4 (60.6 - 72.2)                     | 67.6 (57.4-77.9)                    | 64.4 (55.3, 73.5)                      |
| 3              | 68.7 (63.1 - 74.4)                  | 67.0 (61.2 - 72.7)                     | 64.9 (54.1-75.7)                    | 64.0 (53.1, 74.8)                      |
| 4              | 67.5 (61.6 - 73.5)                  | 66.4 (60.5 - 72.4)                     | 61.8 (64.4, 79.7)                   | 64.7 (51.7, 77.7)                      |

HCT – hematopoietic cell transplantation (HCT); AUC – area under the receiver operating characteristic curve

**Table S5 – Multivariable Hazard Ratios for non-relapse mortality and overall survival in the Sheba Cohort**

|                                             | Non-relapse mortality |                  | Overall mortality |         |
|---------------------------------------------|-----------------------|------------------|-------------------|---------|
|                                             | HR (95% CI)           | P-value          | HR (95% CI)       | P-value |
| <b>SCI score</b>                            |                       |                  |                   |         |
| 0-1                                         |                       | <i>Reference</i> |                   |         |
| 2                                           | 1.90 (0.60, 6.06)     | 0.276            | 1.10 (0.57, 2.13) | 0.775   |
| 3                                           | 3.70 (1.34, 10.19)    | 0.011            | 1.51 (0.85, 2.69) | 0.159   |
| ≥ 4                                         | 5.67 (2.12, 15.16)    | 0.001            | 2.23 (1.30, 3.84) | 0.004   |
| <b>Regimen</b>                              |                       |                  |                   |         |
| <i>Flu + Treo 36-42 g/m<sup>2</sup></i>     |                       | <i>Reference</i> |                   |         |
| <i>Flu + Treo 30 g/m<sup>2</sup></i>        | 0.75 (0.34, 1.67)     | 0.479            | 1.24 (0.74, 2.06) | 0.413   |
| <i>Flu + Melphalan 100 mg/m<sup>2</sup></i> | 0.85 (0.32, 2.25)     | 0.744            | 0.94 (0.49, 1.82) | 0.858   |
| <i>Flu + Melphalan 140 mg/m<sup>2</sup></i> | 1.87 (0.70, 4.97)     | 0.210            | 1.07 (0.46, 2.52) | 0.875   |
| <b>Karnofsky performance status</b>         |                       |                  |                   |         |
| ≤ 80                                        |                       | <i>Reference</i> |                   |         |
| 90 -100                                     | 0.32 (0.16, 0.64)     | 0.001            | 0.37 (0.22, 0.62) | < 0.001 |
| <b>EBMT Disease Risk</b>                    |                       |                  |                   |         |
| <i>Low/Intermediate</i>                     |                       | <i>Reference</i> |                   |         |
| <i>High</i>                                 | 0.83 (0.47, 1.45)     | 0.503            | 0.85 (0.58, 1.25) | 0.404   |
| <b>Recipient CMV serostatus</b>             |                       |                  |                   |         |
| <i>Negative</i>                             |                       | <i>Reference</i> |                   |         |
| <i>Positive</i>                             | 1.11 (0.55, 2.25)     | 0.762            | 1.25 (0.76, 2.05) | 0.383   |
| <b>Donor type</b>                           |                       |                  |                   |         |
| <i>Matched related</i>                      |                       | <i>Reference</i> |                   |         |
| <i>Matched unrelated</i>                    | 2.25 (1.08, 4.71)     | 0.031            | 1.54 (0.88, 2.70) | 0.133   |
| <i>Mismatched</i>                           | 1.15 (0.61, 2.16)     | 0.665            | 1.02 (0.67, 1.55) | 0.931   |

CI – confidence interval; HR – hazard ratio; SCI – simplified comorbidity index; Flu – fludarabine; Treo – treosulfan; EBMT – European Society for Blood and Marrow Transplantation; CMV - cytomegalovirus

**Table S6 –Cox Multivariable Regression for non-relapse mortality and overall survival in the Sheba cohort**

|                                                   | Non-relapse mortality |                  | Overall survival  |         |
|---------------------------------------------------|-----------------------|------------------|-------------------|---------|
|                                                   | HR (95% CI)           | P-value          | HR (95% CI)       | P-value |
| <b>SCI score</b>                                  |                       |                  |                   |         |
| 0-1                                               |                       | <i>Reference</i> |                   |         |
| 2                                                 | 1.45 (0.45, 4.66)     | 0.535            | 1.00 (0.52, 1.95) | 0.989   |
| 3                                                 | 3.77 (1.36, 10.46)    | 0.011            | 1.50 (0.84, 2.68) | 0.171   |
| ≥ 4                                               | 4.86 (1.82, 12.99)    | 0.002            | 2.15 (1.25, 3.69) | 0.006   |
| <b>Regimen</b>                                    |                       |                  |                   |         |
| <i>Fludarabine-treosulfan 36 mg/m<sup>2</sup></i> |                       | <i>Reference</i> |                   |         |
| <i>Fludarabine-treosulfan 30 mg/m<sup>2</sup></i> | 0.56 (0.25, 1.27)     | 0.164            | 1.09 (0.66, 1.82) | 0.733   |
| <i>Flu + Melphalan 100 mg/m<sup>2</sup></i>       | 0.73 (0.27, 1.97)     | 0.536            | 0.93 (0.48, 1.80) | 0.823   |
| <i>Flu + Melphalan 140 mg/m<sup>2</sup></i>       | 2.22 (0.84, 5.87)     | 0.110            | 1.16 (0.50, 2.74) | 0.727   |
| <b>Karnofsky performance status</b>               |                       |                  |                   |         |
| ≤ 80                                              |                       | <i>Reference</i> |                   |         |
| 90 -100                                           | 0.28 (0.14, 0.57)     | < 0.001          | 0.36 (0.21, 0.61) | < 0.001 |
| <b>CIBMTR Disease Risk</b>                        |                       |                  |                   |         |
| <i>Low/Intermediate</i>                           |                       | <i>Reference</i> |                   |         |
| <i>High</i>                                       | 0.78 (0.58, 1.05)     | 0.096            | 0.85 (0.69, 1.03) | 0.101   |
| <b>Recipient CMV serostatus</b>                   |                       |                  |                   |         |
| <i>Negative</i>                                   |                       | <i>Reference</i> |                   |         |
| <i>Positive</i>                                   | 0.96 (0.47, 1.95)     | 0.913            | 1.18 (0.72, 1.94) | 0.514   |
| <b>Donor type</b>                                 |                       |                  |                   |         |
| <i>Matched related</i>                            |                       | <i>Reference</i> |                   |         |
| <i>Matched unrelated</i>                          | 1.13 (0.60, 2.15)     | 0.701            | 1.02 (0.67, 1.55) | 0.934   |
| <i>Mismatched</i>                                 | 1.61 (0.76, 3.44)     | 0.216            | 1.27 (0.72, 2.26) | 0.410   |
| <b>Acute GvHD grade*</b>                          |                       |                  |                   |         |
| 0 - 1                                             |                       | <i>Reference</i> |                   |         |
| ≥ 2                                               | 6.87 (3.43, 13.76)    | < 0.001          | 2.42 (1.51, 3.88) | < 0.001 |

\* Time-dependent covariate

CI – confidence interval; HR – hazard ratio; SCI – simplified comorbidity index; EBMT – European Society for Blood and Marrow Transplantation; CMV - cytomegalovirus CMV – cytomegalovirus; GvHD – graft-versus host disease
